# Supplementary material
Source: PubMed Central journal article supplement (PMC5815013)
Supplement: jama-317-1785-s001.pdf [file jama-317-1785-s001.pdf]

## Supplementary Online Content

Larkin I, Ang D, Steinhart J, et al. Association between academic medical center pharmaceutical detailing policies and physician prescribing. *JAMA*. doi:10.1001/jama.2017.4039

**eTable 1.** AMCs and hospitals included in study

**eTable 2.** Study drug classes and drugs

**eTable 3.** Results of regression estimating months to intervention differences between intervention and control groups

**eTable 4.** Results of alternative regression models

This supplementary material has been provided by the authors to give readers additional information about their work.

**eTable 1.** AMCs and hospitals included in study

| <b>Intervention AMCs</b>                | <b>Corresponding Hospitals</b>                         |
|-----------------------------------------|--------------------------------------------------------|
| Boston University                       | Boston Medical Center                                  |
| Mount Sinai                             | Mount Sinai Hospital                                   |
|                                         | Mount Sinai Hospital of Queens                         |
| Northwestern University                 | Northwestern Memorial Hospital                         |
|                                         | Children’s Memorial Hospital                           |
| Rush University                         | John Stroger Hospital                                  |
|                                         | Provident Hospital                                     |
|                                         | Rush University Medical Center                         |
|                                         | Rush Oak Park Hospital                                 |
| Stanford University                     | Stanford Hospital and Clinics                          |
|                                         | Lucile Packard Children’s Hospital                     |
| University of California, Davis         | UC Davis Medical Center                                |
| University of California, Los Angeles   | Harbor UCLA Medical Center                             |
|                                         | Resnick Neuropsychiatric Hospital                      |
|                                         | Ronald Reagan UCLA Medical                             |
|                                         | Santa Monica UCLA Medical Center and Orthopaedic Hosp. |
|                                         | ValleyCare Olive View UCLA Medical Center              |
| University of California, San Francisco | UCSF Medical Center                                    |
|                                         | UCSF Medical Center at Mount Zion                      |
| University of California, San Diego     | UCSD Medical Center Hillcrest                          |
|                                         | UCSD John and Sally Thornton Hospital                  |
| University of Illinois, Chicago         | University of Illinois Medical Center at Chicago       |
| University of Massachusetts             | UMass Children’s Medical Center                        |
|                                         | UMass Memorial Medical Center Memorial Campus          |
|                                         | UMass Memorial Medical Center University Campus        |
|                                         | Wing Memorial Hospital Corporation                     |
| University of Pittsburgh                | Children’s Hospital of Pittsburgh of UPMC              |
|                                         | Magee-Women’s Hospital of UPMC                         |
|                                         | UPMC Bedford Memorial                                  |
|                                         | UPMC Braddock                                          |
|                                         | UPMC Horizon Greenville                                |
|                                         | UPMC Horizon Shenango                                  |
|                                         | UPMC McKeesport                                        |
|                                         | UPMC Mercy                                             |
|                                         | UPMC Montefiore Hospital                               |
|                                         | UPMC Northwest                                         |
|                                         | UPMC Passavant Cranberry                               |
|                                         | UPMC Presbyterian                                      |
| UPMC Saint Margaret                     |                                                        |

| <b>Intervention AMCs</b>                                                                | <b>Corresponding Hospitals</b>                              |
|-----------------------------------------------------------------------------------------|-------------------------------------------------------------|
|                                                                                         | UPMC Shadyside                                              |
|                                                                                         | Western Psychiatric Institute and Clinic                    |
| University of Rochester                                                                 | University of Rochester Medical                             |
| University of Southern California                                                       | Good Samaritan Hospital                                     |
|                                                                                         | Los Angeles County USC Healthcare Network                   |
|                                                                                         | USC Norris Cancer Hospital                                  |
|                                                                                         | USC University Hospital                                     |
| New York Medical College                                                                | Metropolitan Hospital Center                                |
|                                                                                         | Westchester County Healthcare                               |
| State University of New York, Downstate                                                 | Kings County Hospital Center                                |
|                                                                                         | SUNY Downstate Medical Center                               |
| Temple University                                                                       | Jeanes Hospital                                             |
|                                                                                         | Temple East                                                 |
|                                                                                         | Temple University Hospital                                  |
|                                                                                         | Temple University Hospital, Episcopal Campus                |
| Thomas Jefferson University                                                             | Thomas Jefferson University Hospital                        |
| Tufts University                                                                        | Tufts Medical Center                                        |
|                                                                                         | Tufts Medical Center and The Floating Hospital for Children |
|                                                                                         |                                                             |
| <b>AMC with detailing policies excluded from sample due extremely small sample size</b> |                                                             |
| Stony Brook University                                                                  | Stony Brook University Medical Center                       |
| <b>AMCs with detailing policies implemented before 2007 (not included in study)</b>     |                                                             |
| <b>AMC</b>                                                                              | <b>Policy Date</b>                                          |
| Loyola University                                                                       | August 2005                                                 |
| New York University                                                                     | October 1999                                                |
| Cornell University                                                                      | October 1999                                                |
| Partners Healthcare (Harvard)                                                           | March 2005                                                  |
| Robert Wood Johnson                                                                     | August 1998                                                 |
| University of California, Irvine                                                        | September 1994                                              |
| University of Chicago                                                                   | August 1992                                                 |
| University of Pennsylvania                                                              | January 2002                                                |
| Yeshiva University                                                                      | May 1993                                                    |

**eTable 2.** Study drug classes and drugs

Bio-equivalent generic and brand name drugs are on the same line, if both were included in the study; if one is missing, it was not in the study as it was either not available or did not reach sufficient market share.

| Generic Name                                  | Brand Name     | Month of initial generic availability (if occurred during study period) |
|-----------------------------------------------|----------------|-------------------------------------------------------------------------|
| <b>Lipid-lowering agents (22 drugs total)</b> |                |                                                                         |
| Atorvastatin                                  | Lipitor        | November, 2011                                                          |
| Fenofibrate                                   | Lofibra        |                                                                         |
|                                               | Tricor         |                                                                         |
| Lovastatin                                    | Mevacor        |                                                                         |
| Pravastatin Sodium                            | Pravachol      | May, 2006                                                               |
| Simvastatin                                   | Zocor          | June, 2006                                                              |
| Cholestyramine                                |                |                                                                         |
| Gemfibrozil                                   |                |                                                                         |
|                                               | Advicor        |                                                                         |
|                                               | Caduet         |                                                                         |
|                                               | Crestor        |                                                                         |
|                                               | Lescol         |                                                                         |
|                                               | Lescol XL      |                                                                         |
|                                               | Lovaza         |                                                                         |
|                                               | Simcor         |                                                                         |
|                                               | Vytorin        |                                                                         |
|                                               | Zetia          |                                                                         |
| <b>GERDs (15 drugs total)</b>                 |                |                                                                         |
| Famotidine                                    | Pepcid         |                                                                         |
| Lansoprazole                                  | Prevacid       |                                                                         |
| Lansoprazole, Extended Release                | Prevacid 24 HR | November, 2009                                                          |
| Omeprazole                                    | Prilosec       |                                                                         |
| Pantoprazole Sodium                           | Protonix       | August, 2007                                                            |
| Nizatidine                                    |                |                                                                         |
| Ranitidine HCL                                |                |                                                                         |
| Sucralfate                                    |                |                                                                         |
|                                               | Naprapac       |                                                                         |

| <b>Generic Name</b>                  | <b>Brand Name</b> | <b>Month of initial generic availability (if occurred during study period)</b> |
|--------------------------------------|-------------------|--------------------------------------------------------------------------------|
|                                      | Prevpac           |                                                                                |
|                                      |                   |                                                                                |
|                                      |                   |                                                                                |
| <b>Antidiabetic (46 drugs total)</b> |                   |                                                                                |
| Acarbose                             | Precose           |                                                                                |
| Chlorpropamide                       | Diabinese         |                                                                                |
| Glimepiride                          | Amaryl            |                                                                                |
| Glipizide                            | Glucotrol         |                                                                                |
| Glipizide/Metformin                  | Metaglip          |                                                                                |
| Glyburide                            | Diabeta           |                                                                                |
| Glyburide/Metformin                  | Glucovance        |                                                                                |
| Metformin                            | Glucophage        |                                                                                |
| Miglitol                             | Glyset            |                                                                                |
| Nateglinide                          | Starlix           | September, 2009                                                                |
| Tolazamide                           |                   |                                                                                |
| Tolbutamide                          |                   |                                                                                |
|                                      | Actos             |                                                                                |
|                                      | Apidra            |                                                                                |
|                                      | Avandamet         |                                                                                |
|                                      | Avandaryl         |                                                                                |
|                                      | Avandia           |                                                                                |
|                                      | Byetta            |                                                                                |
|                                      | Cycloset          |                                                                                |
|                                      | Humalog           |                                                                                |
|                                      | Humalog NPL       |                                                                                |
|                                      | Humilin N         |                                                                                |
|                                      | Humilin R         |                                                                                |
|                                      | Janumet           |                                                                                |
|                                      | Januvia           |                                                                                |
|                                      | Lantus            |                                                                                |
|                                      | Levemir           |                                                                                |
|                                      | Novolin N         |                                                                                |
|                                      | Novolin NPH       |                                                                                |
|                                      | Novolin R         |                                                                                |
|                                      | Novolog           |                                                                                |

| <b>Generic Name</b>                      | <b>Brand Name</b> | <b>Month of initial generic availability (if occurred during study period)</b> |
|------------------------------------------|-------------------|--------------------------------------------------------------------------------|
|                                          | Ongylza           |                                                                                |
|                                          | Prandimet         |                                                                                |
|                                          | Prandin           |                                                                                |
|                                          | Tradjenta         |                                                                                |
|                                          | Victoza           |                                                                                |
|                                          |                   |                                                                                |
| <b>Antihypertensive (69 drugs total)</b> |                   |                                                                                |
| Amlodipine                               | Norvasc           | January, 2007                                                                  |
| Amlodipine Besylate/Benazepril           | Lotrel            | May, 2007                                                                      |
| Atenolol                                 | Tenormin          |                                                                                |
| Benazepril                               | Lotensin          |                                                                                |
| Benazepril/Hydrochlorothiazide           | Lotensin HCT      |                                                                                |
| Bisoprol/Hydrochlorothiazide             | Ziac              |                                                                                |
| Carvedilol                               | Coreg             |                                                                                |
| Enalapril Maleate                        | Vasotec           |                                                                                |
| Enalapril Maleate/Hydrochlorothiazide    | Vasotec HCT       |                                                                                |
| Fosinopril Sodium                        | Monopril          |                                                                                |
| Lisinopril                               | Zestril           |                                                                                |
| Lisinopril/Hydrochlorothiazide           | Zestoretic        |                                                                                |
| Losartan                                 | Cozaar            | April, 2010                                                                    |
| Losartan/Hydrochlorothiazide             | Hyzaar            | April, 2010                                                                    |
| Metoprol/Hydrochlorothiazide             | Dutoprol          |                                                                                |
| Metoprolol Tartrate                      | Lopressor         |                                                                                |
| Metoprolol, Extended Release             | Toprol XL         | August, 2009                                                                   |
| Nebivolol                                | Bystolic          |                                                                                |
| Perindopril Erbumine                     | Aceon             | November, 2009                                                                 |
| Quinapril                                | Accupril          |                                                                                |
| Quinapril/Hydrochlorothiazide            | Acurretic         |                                                                                |
| Ramipril                                 | Altace            | September, 2007                                                                |
| Trandolapril                             | Mavik             | June, 2007                                                                     |
| Doxazosin Mesylate                       |                   |                                                                                |
| Labetalol                                |                   |                                                                                |
| Methyldopa                               |                   |                                                                                |
| Methyldopa/Hydrochlorothiazide           |                   |                                                                                |
| Nadolol                                  |                   |                                                                                |

| <b>Generic Name</b>                | <b>Brand Name</b> | <b>Month of initial generic availability (if occurred during study period)</b> |
|------------------------------------|-------------------|--------------------------------------------------------------------------------|
| Penbutolol Sulfate                 |                   |                                                                                |
| Pindolol                           |                   |                                                                                |
| Prazosin                           |                   |                                                                                |
| Propranolol                        |                   |                                                                                |
| Sotalol                            |                   |                                                                                |
| Terazosin                          |                   |                                                                                |
|                                    | Atacand           |                                                                                |
|                                    | Atacand HCT       |                                                                                |
|                                    | Avapro            |                                                                                |
|                                    | Avalide           |                                                                                |
|                                    | Diovan            |                                                                                |
|                                    | Diovan HCT        |                                                                                |
|                                    | Exforge           |                                                                                |
|                                    | Exforge HCT       |                                                                                |
|                                    | Micardis          |                                                                                |
|                                    | Micardis HCT      |                                                                                |
|                                    | Tekturna          |                                                                                |
|                                    | Valturna          |                                                                                |
|                                    |                   |                                                                                |
| <b>Sleep Aid (17 drugs total)</b>  |                   |                                                                                |
| Estazolam                          | ProSom            |                                                                                |
| Flurazepam HCL                     | Dalmane           |                                                                                |
| Temazepam                          | Restoril          |                                                                                |
| Triazolam                          | Halcion           |                                                                                |
| Zaleplon                           | Sonata            | June, 2008                                                                     |
| Zolpidem                           | Ambien            | April, 2007                                                                    |
| Zolpidem, Extended Release         | Ambien CR         | October, 2010                                                                  |
| Quazepam                           |                   |                                                                                |
|                                    | Lunesta           |                                                                                |
|                                    | Rozerem           |                                                                                |
|                                    |                   |                                                                                |
| <b>ADHD Drugs (16 drugs total)</b> |                   |                                                                                |
| Amphetamine, Dextroamphetamine     | Adderall          |                                                                                |
| Clonidine                          | Kapvay            |                                                                                |
| Dexmethylphenidate HCL             | Focalin           |                                                                                |

| <b>Generic Name</b>                     | <b>Brand Name</b> | <b>Month of initial generic availability (if occurred during study period)</b> |
|-----------------------------------------|-------------------|--------------------------------------------------------------------------------|
| Dextroamphetamine Sulfate               | Procentra         |                                                                                |
| Guanfacine HCL                          | Intuniv           |                                                                                |
| Methylphenidate                         | Concerta          |                                                                                |
|                                         | Methylin          |                                                                                |
|                                         | Ritalin           |                                                                                |
|                                         | Adderall XR       |                                                                                |
|                                         | Strattera         |                                                                                |
| <b>Antidepressives (55 drugs total)</b> |                   |                                                                                |
| Amitriptyline                           | Elavil            |                                                                                |
| Amoxapine                               | Asendin           |                                                                                |
| Bupropion Hbr                           | Aplenzin          |                                                                                |
| Bupropion HCL                           | Wellbutrin        |                                                                                |
| Bupropion, Extended Release             | Wellbutrin XL     | January, 2007                                                                  |
| Bupropion, Sustained release            | Wellbutrin SR     |                                                                                |
| Clomipramine HCL                        | Anafranil         |                                                                                |
| Desipramine HCL                         | Norpramin         |                                                                                |
| Doxepin HCL                             | Sinequan          |                                                                                |
| Escitalopram                            | Lexapro           | March, 2012                                                                    |
| Fluoxetine                              | Prozac            |                                                                                |
| Fluoxetine Dr                           | Prozac Weekly     | April, 2010                                                                    |
| Imipramine HCL                          | Tofranil          |                                                                                |
| Maprotiline HCL                         | Ludiomil          |                                                                                |
| Mirtazapine                             | Remeron           |                                                                                |
| Nortriptyline HCL                       | Pamelor           |                                                                                |
| Paroxetine HCL                          | Paxil             |                                                                                |
| Paroxetine HCL, extended release        | Paxil CR          | July, 2007                                                                     |
| Selegiline HCL                          | Emsam             |                                                                                |
| Sertraline HCL                          | Zoloft            | July, 2007                                                                     |
| Trazodone HCL                           | Desyrel           |                                                                                |
| Venlafaxine                             | Effexor           |                                                                                |
| Venlafaxine, Extended Release           | Effexor XR        | June, 2010                                                                     |
| Nefazodone HCL                          |                   |                                                                                |
| Protriptyline HCL                       |                   |                                                                                |



| <b>Generic Name</b>                    | <b>Brand Name</b> | <b>Month of initial generic availability (if occurred during study period)</b> |
|----------------------------------------|-------------------|--------------------------------------------------------------------------------|
| Tranlycypromine Sulfate                |                   |                                                                                |
|                                        | Celexa            |                                                                                |
|                                        | Cymbalta          |                                                                                |
|                                        | Etrafon           |                                                                                |
|                                        | Lexapro           |                                                                                |
|                                        | Pristiq           |                                                                                |
|                                        | Symbyax           |                                                                                |
|                                        |                   |                                                                                |
| <b>Antipsychotics (22 drugs total)</b> |                   |                                                                                |
| Clozapine                              | Clozaril          |                                                                                |
| Diazepam                               | Diastat           |                                                                                |
| Haloperidol                            | Haldol            |                                                                                |
| Olanzapine                             | Zyprexa           | November, 2011                                                                 |
| Risperidone                            | Risperdal         | December, 2008                                                                 |
| Thiothixene                            | Navane            |                                                                                |
| Chlorpromazine                         |                   |                                                                                |
| Fluphenazine                           |                   |                                                                                |
| Loxapine Succinate                     |                   |                                                                                |
| Perphenazine                           |                   |                                                                                |
| Perphenazine/Amitriptyline             |                   |                                                                                |
| Thioridazine                           |                   |                                                                                |
| Trifluoperazine                        |                   |                                                                                |
|                                        | Abilify           |                                                                                |
|                                        | Geodon            |                                                                                |
|                                        | Seroquel          |                                                                                |

Table Notes:

1. Bio-equivalent generic and brand name drugs are listed on the same row, when both were in the database. If a generic drug is listed with no corresponding brand name, then the branded version of the drug did not reach 0.5% market share during the study period. If a branded drug is listed with no corresponding generic name, then the generic version of the drug did not reach 0.5% market share during the study period (because the drug was protected by patent for all or nearly all of the study period).
2. A “branded” drug is not equivalent to a “detailed” drug. “Branded” means it was manufactured by a pharmaceutical company and given a brand name. Generic drugs are only known by their biological names, and do not carry brand names. In

the study, a “detailed” drug is one that was actively marketed to doctors during detailing visits in a given month. Branded drugs with bio-equivalent generic drugs are almost never detailed in the data. Branded drugs with no bioequivalent available in a given month are usually, but not always, detailed.

**eTable 3.** Results of regression estimating months to intervention differences between intervention and control groups

| Months to intervention | Coefficient * | 95% CI Lower Bound | 95% CI Upper Bound | P-value**       |
|------------------------|---------------|--------------------|--------------------|-----------------|
| t-12                   | -0.07         | -1.17              | 1.03               | 0.90            |
| t-11                   | -0.22         | -1.53              | 1.08               | 0.74            |
| t-10                   | 0.06          | -1.16              | 1.28               | 0.92            |
| t-9                    | -0.46         | -1.64              | 0.72               | 0.44            |
| t-8                    | -1.08         | -2.36              | 0.20               | 0.10            |
| t-7                    | -0.46         | -1.68              | 0.76               | 0.46            |
| t-6                    | -0.27         | -1.33              | 0.78               | 0.61            |
| t-5                    | -0.99         | -2.05              | 0.07               | 0.07            |
| t-4                    | -0.81         | -1.92              | 0.30               | 0.15            |
| t-3                    | -1.05         | -2.22              | 0.11               | 0.08            |
| t-2                    | -0.58         | -1.73              | 0.56               | 0.32            |
| t-1***                 | .             | .                  | .                  | .               |
| t-0                    | -1.82         | -3.01              | -0.64              | <b>0.003</b>    |
| t+1                    | -1.62         | -2.65              | -0.59              | <b>0.002</b>    |
| t+2                    | -1.58         | -2.62              | -0.54              | <b>0.003</b>    |
| t+3                    | -1.53         | -2.59              | -0.47              | <b>0.005</b>    |
| t+4                    | -1.86         | -2.88              | -0.85              | <b>&lt;.001</b> |
| t+5                    | -1.26         | -2.33              | -0.19              | <b>0.02</b>     |
| t+6                    | -2.01         | -3.04              | -0.99              | <b>&lt;.001</b> |
| t+7                    | -1.85         | -2.87              | -0.83              | <b>&lt;.001</b> |
| t+8                    | -2.08         | -3.10              | -1.05              | <b>&lt;.001</b> |
| t+9                    | -1.84         | -2.79              | -0.89              | <b>&lt;.001</b> |
| t+10                   | -2.00         | -2.97              | -1.03              | <b>&lt;.001</b> |
| t+11                   | -1.77         | -2.74              | -0.80              | <b>&lt;.001</b> |
| t+12                   | -1.25         | -2.35              | -0.14              | <b>0.03</b>     |

\*Note: coefficient represents the estimated difference in percentage points of market share between intervention and control groups, compared to difference in month t-1

\*\* p<.05 in bold

\*\*\* month to treatment = -1 was excluded from the regression, as it represents the comparison at which all other estimates are being made

**eTable 4.** Results of alternative regression models

(i) Regression models run separately by generalists and specialists

|                        | Detailed drugs                                                       |                         |         | Non-detailed drugs                                                   |                         |         |
|------------------------|----------------------------------------------------------------------|-------------------------|---------|----------------------------------------------------------------------|-------------------------|---------|
|                        | Change in market share associated with policy (in percentage points) | 95% Confidence Interval | P-Value | Change in market share associated with policy (in percentage points) | 95% Confidence Interval | P-Value |
| Generalists, all drugs | -1.92                                                                | (2.74) - (1.19)         | <.001   | 1.23                                                                 | 0.78 - 1.69             | <.001   |
| Specialists, all drugs | -1.46                                                                | (2.08) - (0.83)         | <.001   | 0.67                                                                 | 0.30 - 1.04             | <.001   |

(ii) Regression model using total monthly count of a physician-drug pair as dependent variable (not market share)

|                           | Detailed drugs                                      |                         |         | Non-detailed drugs                                  |                         |         |
|---------------------------|-----------------------------------------------------|-------------------------|---------|-----------------------------------------------------|-------------------------|---------|
|                           | Change in prescription count associated with policy | 95% Confidence Interval | P-Value | Change in prescription count associated with policy | 95% Confidence Interval | P-Value |
| All physicians, all drugs | -0.13                                               | (0.18) - (0.09)         | <.001   | 0.09                                                | 0.05 - 0.12             | <.001   |
|                           |                                                     |                         |         |                                                     |                         |         |

(iii) Regression model limiting intervention physicians to closest 5 matches

|                           | <b>Detailed drugs</b>                                                       |                                |                | <b>Non-detailed drugs</b>                                                   |                                |                |
|---------------------------|-----------------------------------------------------------------------------|--------------------------------|----------------|-----------------------------------------------------------------------------|--------------------------------|----------------|
|                           | <b>Change in market share associated with policy (in percentage points)</b> | <b>95% Confidence Interval</b> | <b>P-Value</b> | <b>Change in market share associated with policy (in percentage points)</b> | <b>95% Confidence Interval</b> | <b>P-Value</b> |
| All physicians, all drugs | -1.78                                                                       | (2.33) –( 1.22)                | <.001          | 0.87                                                                        | 0.49-1.18                      | <.001          |

(iv) Regression model run as a fractional logit (i.e., log-odds), with market share as dependent variable

|                           | <b>Detailed drugs</b>                                 |                                |                | <b>Non-detailed drugs</b>                             |                                |                |
|---------------------------|-------------------------------------------------------|--------------------------------|----------------|-------------------------------------------------------|--------------------------------|----------------|
|                           | <b>Change in market share associated with policy*</b> | <b>95% Confidence Interval</b> | <b>P-Value</b> | <b>Change in market share associated with policy*</b> | <b>95% Confidence Interval</b> | <b>P-Value</b> |
| All physicians, all drugs | 0.93                                                  | 0.90-0.96                      | <.001          | 1.05                                                  | 1.03-1.08                      | <.001          |

\* Note: regression coefficients have been exponentiated so they represent odds ratios

## (v) Regression models dropping one AMC or drug class

|                     | Detailed drugs                                                       |                         |         | Non-detailed drugs                                                   |                         |         |
|---------------------|----------------------------------------------------------------------|-------------------------|---------|----------------------------------------------------------------------|-------------------------|---------|
|                     | Change in market share associated with policy (in percentage points) | 95% Confidence Interval | P-Value | Change in market share associated with policy (in percentage points) | 95% Confidence Interval | P-Value |
| <i>Dropped AMC:</i> |                                                                      |                         |         |                                                                      |                         |         |
| Stanford            | -1.67                                                                | (2.20) - (1.15)         | <.001   | 0.86                                                                 | 0.54 - 1.18             | <.001   |
| Northwestern        | -1.65                                                                | (2.15) - (1.14)         | <.001   | 0.85                                                                 | 0.52 - 1.18             | <.001   |
| UC Davis            | -1.67                                                                | (2.19) - (1.17)         | <.001   | 0.82                                                                 | 0.51 - 1.13             | <.001   |
| UCLA                | -1.50                                                                | (2.04) - (0.96)         | <.001   | 0.69                                                                 | 0.32 - 1.06             | <.001   |
| UCSF                | -1.69                                                                | (2.21) - (1.19)         | <.001   | 0.87                                                                 | 0.56 - 1.18             | <.001   |
| Boston              | -1.57                                                                | (2.10) - (1.04)         | <.001   | 0.65                                                                 | 0.30 - 1.01             | <.001   |
| Illinois            | -1.61                                                                | (2.13) - (1.09)         | <.001   | 0.74                                                                 | 0.41 - 1.06             | <.001   |
| Mt Sinai            | -1.63                                                                | (2.15) - (1.10)         | <.001   | 0.90                                                                 | 0.57 - 1.22             | <.001   |
| Southern California | -1.65                                                                | (2.19) - (1.11)         | <.001   | 0.81                                                                 | 0.46 - 1.15             | <.001   |
| Pittsburgh          | -1.62                                                                | (2.18) - (1.06)         | <.001   | 0.72                                                                 | 0.37 - 1.08             | <.001   |
| Rochester           | -1.68                                                                | (2.21) - (1.16)         | <.001   | 0.80                                                                 | 0.49 - 1.11             | <.001   |
| UCSD                | -1.70                                                                | (2.23) - (1.17)         | <.001   | 0.88                                                                 | 0.55 - 1.22             | <.001   |
| Massachusetts       | -1.72                                                                | (2.27) - (1.17)         | <.001   | 0.66                                                                 | 0.30 - 1.03             | <.001   |
| Rush                | -1.71                                                                | (2.25) - (1.16)         | <.001   | 0.89                                                                 | 0.55 - 1.23             | <.001   |
| Temple              | -1.67                                                                | (2.20) - (1.16)         | <.001   | 0.87                                                                 | 0.56 - 1.19             | <.001   |
| New York Medical    | -1.65                                                                | (2.20) - (1.10)         | <.001   | 0.86                                                                 | 0.54 - 1.18             | <.001   |
| SUNY Downstate      | -1.69                                                                | (2.20) - (1.20)         | <.001   | 0.79                                                                 | 0.47 - 1.12             | <.001   |
| Tufts               | -1.70                                                                | (2.22) - (1.17)         | <.001   | 0.86                                                                 | 0.53 - 1.20             | <.001   |
| Thomas Jefferson    | -1.67                                                                | (2.19) - (1.18)         | <.001   | 0.85                                                                 | 0.55 - 1.17             | <.001   |

|                            | Detailed drugs                                                       |                         |         | Non-detailed drugs                                                   |                         |         |
|----------------------------|----------------------------------------------------------------------|-------------------------|---------|----------------------------------------------------------------------|-------------------------|---------|
|                            | Change in market share associated with policy (in percentage points) | 95% Confidence Interval | P-Value | Change in market share associated with policy (in percentage points) | 95% Confidence Interval | P-Value |
|                            |                                                                      |                         |         |                                                                      |                         |         |
|                            |                                                                      |                         |         |                                                                      |                         |         |
|                            |                                                                      |                         |         |                                                                      |                         |         |
| <i>Dropped drug class:</i> |                                                                      |                         |         |                                                                      |                         |         |
| Sleep                      | -1.59                                                                | (2.14) - (1.05)         | <.001   | 0.79                                                                 | 0.46 - 1.12             | <.001   |
| GERDs                      | -1.41                                                                | (2.02) - (0.81)         | <.001   | 0.61                                                                 | 0.31 - 0.90             | <.001   |
| ADHD Drugs                 | -1.64                                                                | (2.18) - (1.09)         | <.001   | 0.85                                                                 | 0.54 - 1.16             | <.001   |
| Antidepressives            | -1.57                                                                | (2.13) - (1.00)         | <.001   | 0.72                                                                 | 0.35 - 1.09             | <.001   |
| Statins                    | -1.69                                                                | (2.29) - (1.09)         | <.001   | 0.70                                                                 | 0.32 - 1.08             | <.001   |
| Antihypertensives          | -1.75                                                                | (2.37) - (1.12)         | <.001   | 0.88                                                                 | 0.50 - 1.27             | <.001   |
| Antipsychotics             | -1.60                                                                | (2.13) - (1.07)         | <.001   | 0.90                                                                 | 0.57 - 1.22             | <.001   |
| Antidiabetics              | -1.80                                                                | (2.42) - (1.19)         | <.001   | 0.97                                                                 | 0.56 - 1.39             | <.001   |
|                            |                                                                      |                         |         |                                                                      |                         |         |
